# Supplementary material for: Fatty Acid Composition of Cannabis sativa, Linum usitatissimum and Camelina sativa Seeds Harvested in Lithuania for Food Use
Source: MDPI journal article supplement (doi:10.3390/foods10081902), 2021-08-16
Supplement: s1 [file s1]

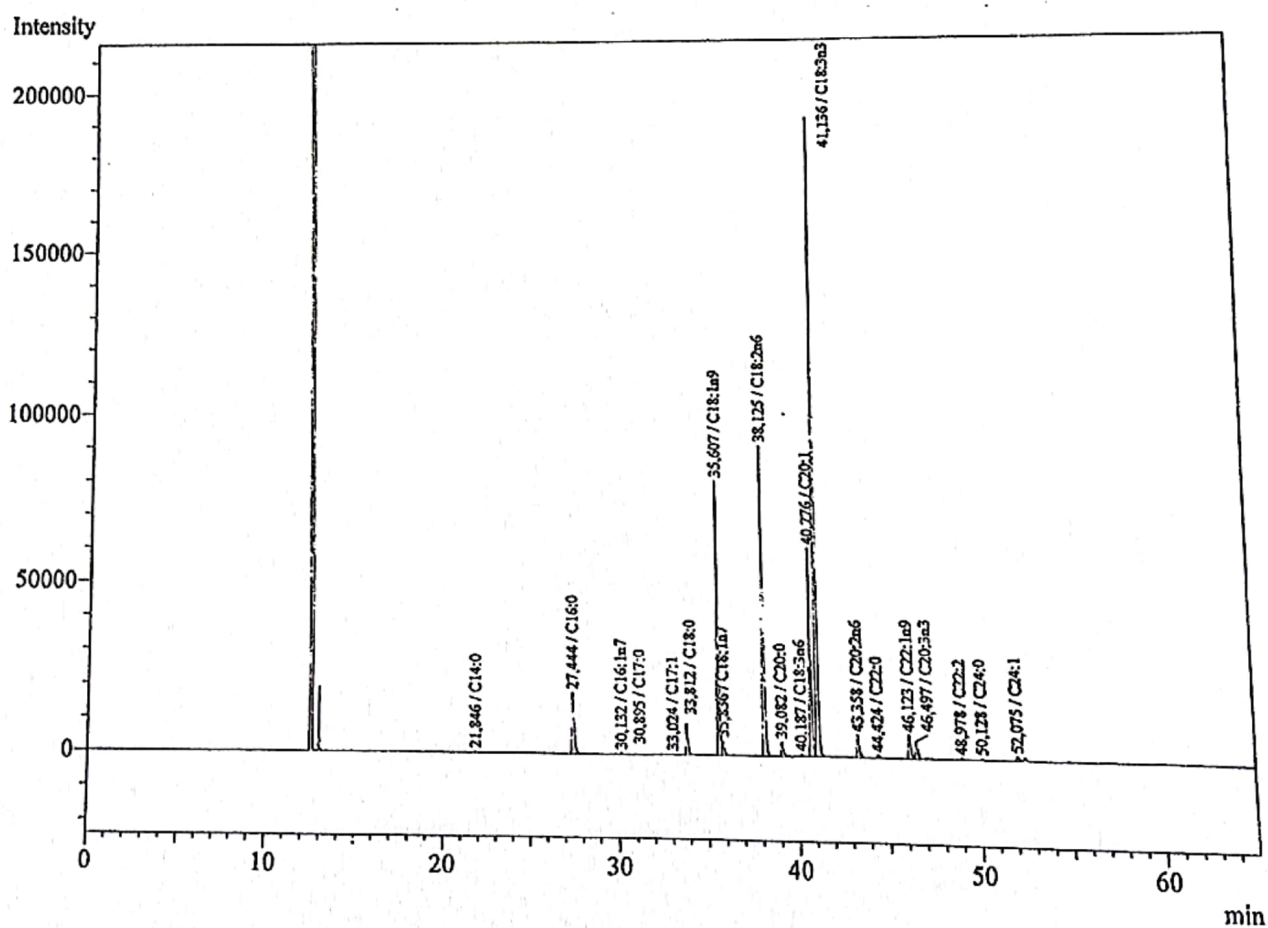

Figure S 1: Gas liquid chromatography chromatogram 277 of the methyl esters from *Camelina sativa* seeds.

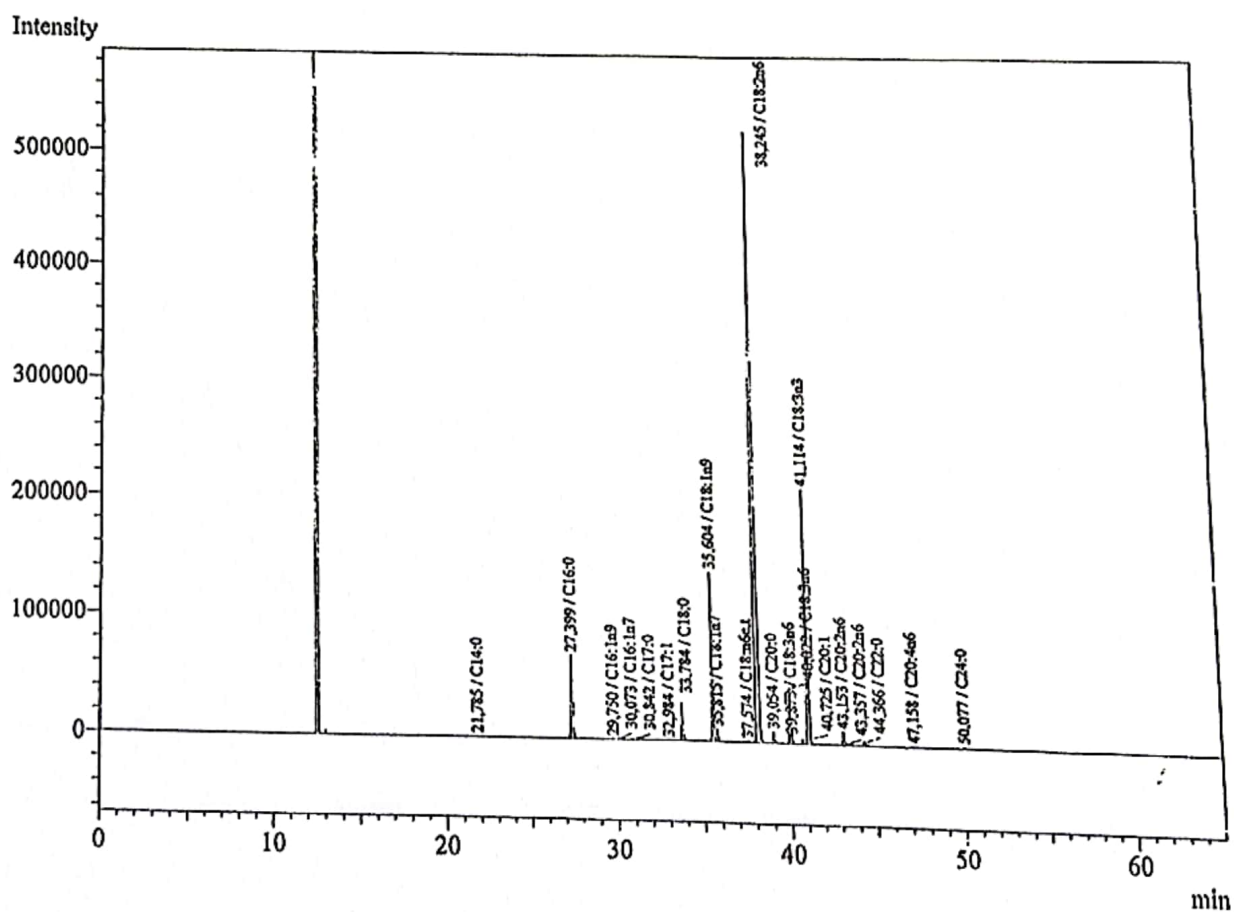

Figure S 2: Gas liquid chromatography chromatogram 257 of the metil esters from Cannabis sativa seeds.

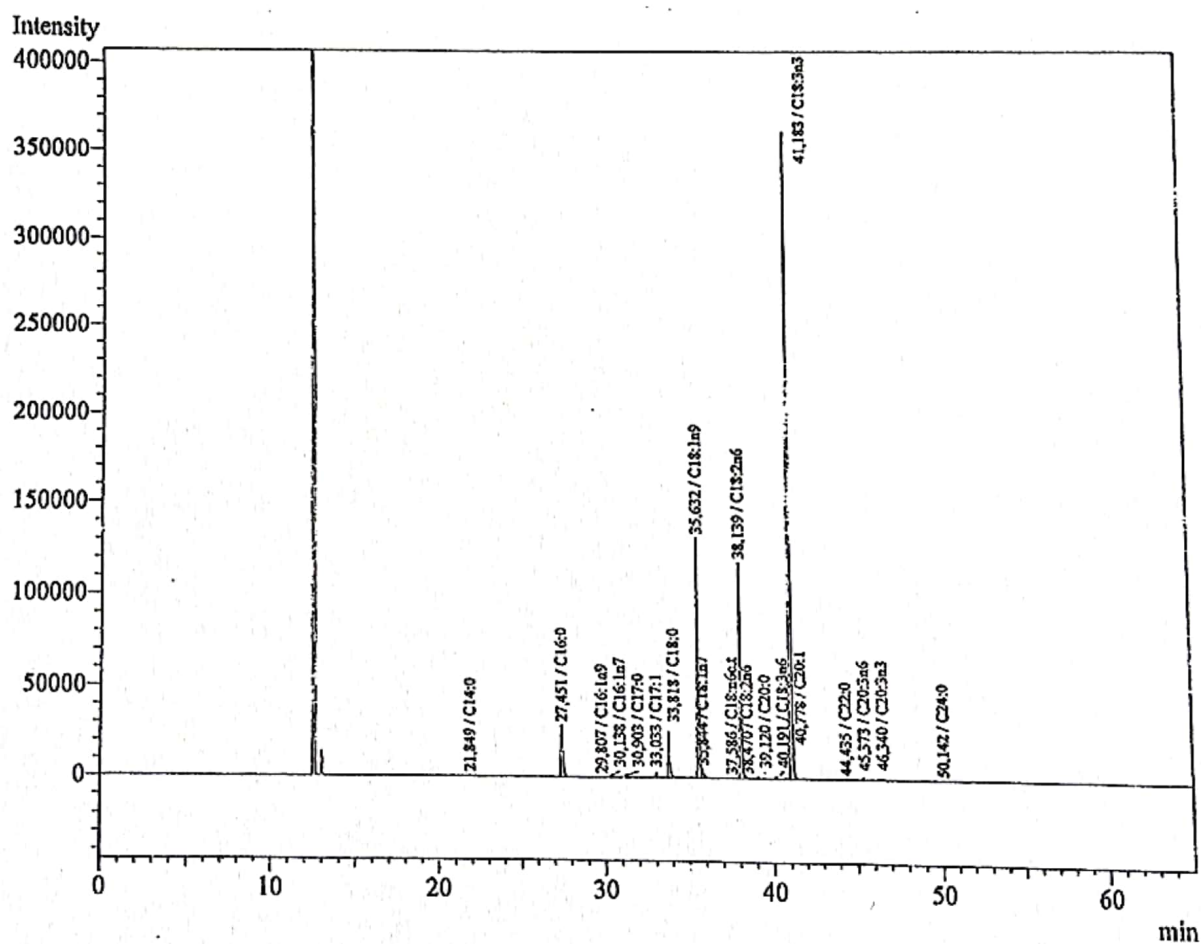

Figure S 3: Gas liquid chromatography chromatogram 274 of the metil esters from *Linum usitatissimum* seeds.
